# Supplementary material for: Tailored nanoplateau and nanochannel structures using solution-processed rutile TiO2 thin films for complementary and bipolar switching characteristics
Source: Royal Society of Chemistry journal article supplement (doi:10.1039/c9nr03465j), 2019-01-01
Supplement: c9nr03465j1.pdf [file c9nr03465j1.pdf]

## Supporting Information

### **Tailored Nano Structures of Solution-Processed Rutile TiO<sub>2</sub> Thin Films for Complementary and Bipolar Switching Characteristics**

Yawar Abbas,<sup>#,1</sup> Rohan B. Ambade,<sup>#,2,3</sup> Swapnil B. Ambade,<sup>#,2,3</sup> Tae Hee Han<sup>2,3 \*</sup>,  
Changhwan Choi<sup>4,\*</sup>

<sup>1</sup>Department of Physics, Khalifa University, Abu Dhabi 127788, United Arab Emirates

<sup>2</sup>Department of Organic and Nano Engineering, Hanyang University, Seoul 04763, Republic of Korea

<sup>3</sup>The Research Institute of Industrial Science, Hanyang University, Seoul 04763, Republic of Korea.

<sup>4</sup>Division of Materials Science and Engineering, Hanyang University, Seoul 04763, Republic of Korea.

<sup>#</sup>Authors contributed equally

Corresponding authors' e-mail: [than@hanyang.ac.kr](mailto:than@hanyang.ac.kr), [cchoi@hanyang.ac.kr](mailto:cchoi@hanyang.ac.kr)

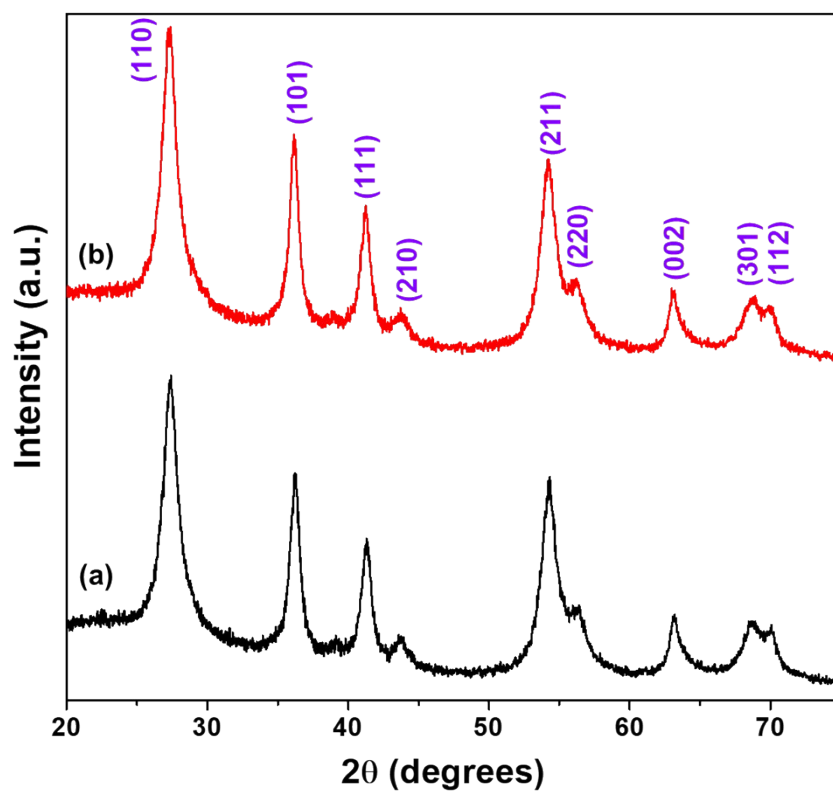

**Figure S1.** XRD patterns of TiO<sub>2</sub> deposited using different concentrations (a) 0.1 M, and (b) 0.15 M.

**Table S1.** Comparison of d-spacing (Å) values of TiO<sub>2</sub> at different concentrations from XRD data.

| Sample | (110)  | (101)  | (111)  | (210)  | (211)  | (002)  | (301)  | (112)  |
|--------|--------|--------|--------|--------|--------|--------|--------|--------|
| 0.1 M  | 3.250  | 2.4821 | 2.1831 | 2.0647 | 1.6895 | 1.4731 | 1.3601 | 1.3403 |
| 0.15 M | 3.2614 | 2.5243 | 2.1921 | 2.0790 | 1.6910 | 1.4748 | 1.3672 | 1.3445 |

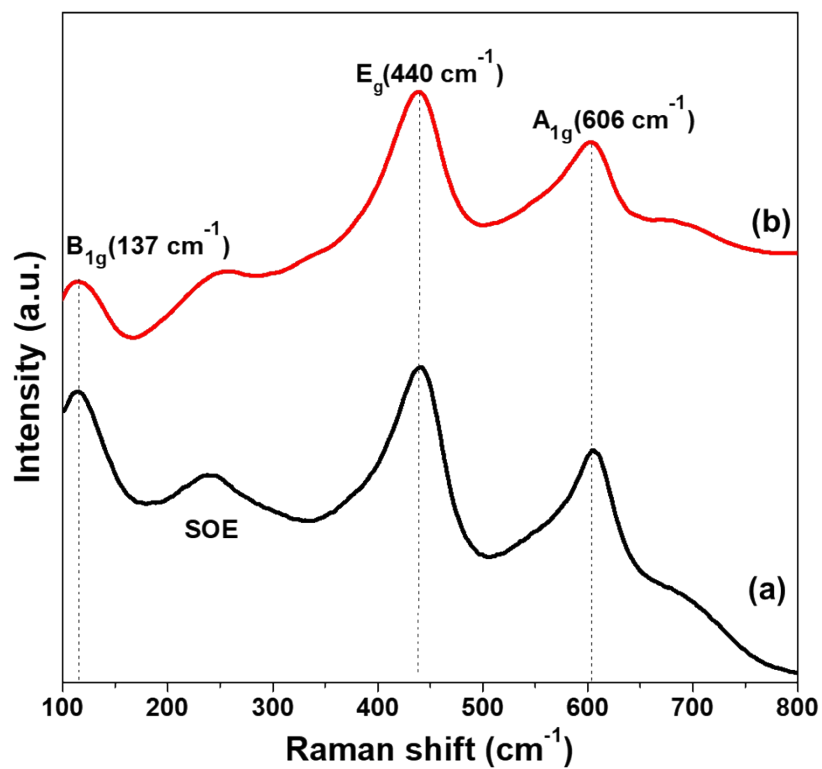

**Figure S2.** Raman patterns of TiO<sub>2</sub> deposited using different concentrations (a) 0.1 M, and (b) 0.15 M.

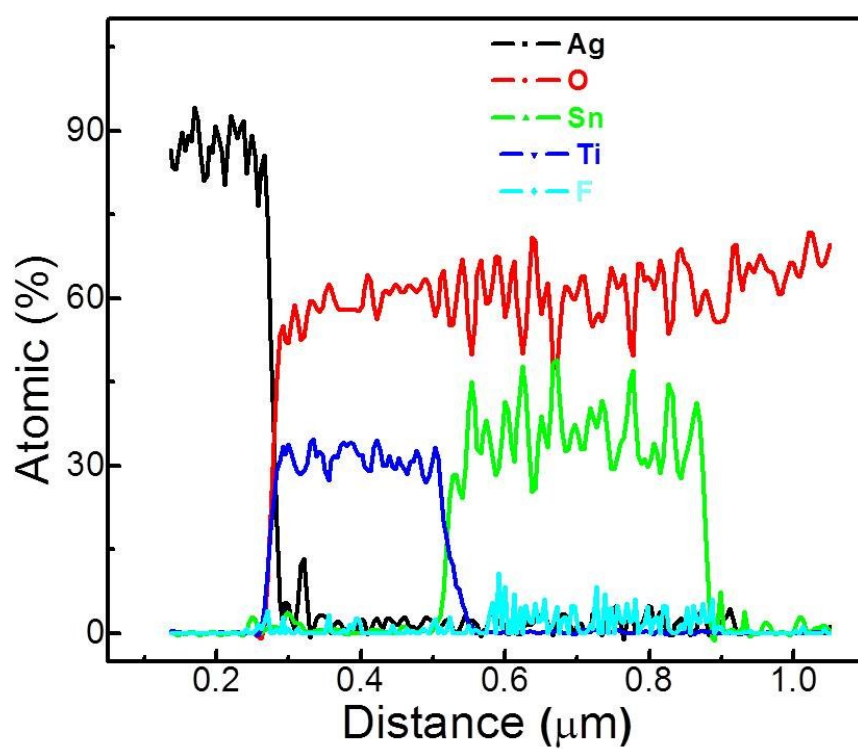

**Figure S3.** The elemental line EDS of the device using HTEAM in STEM mode

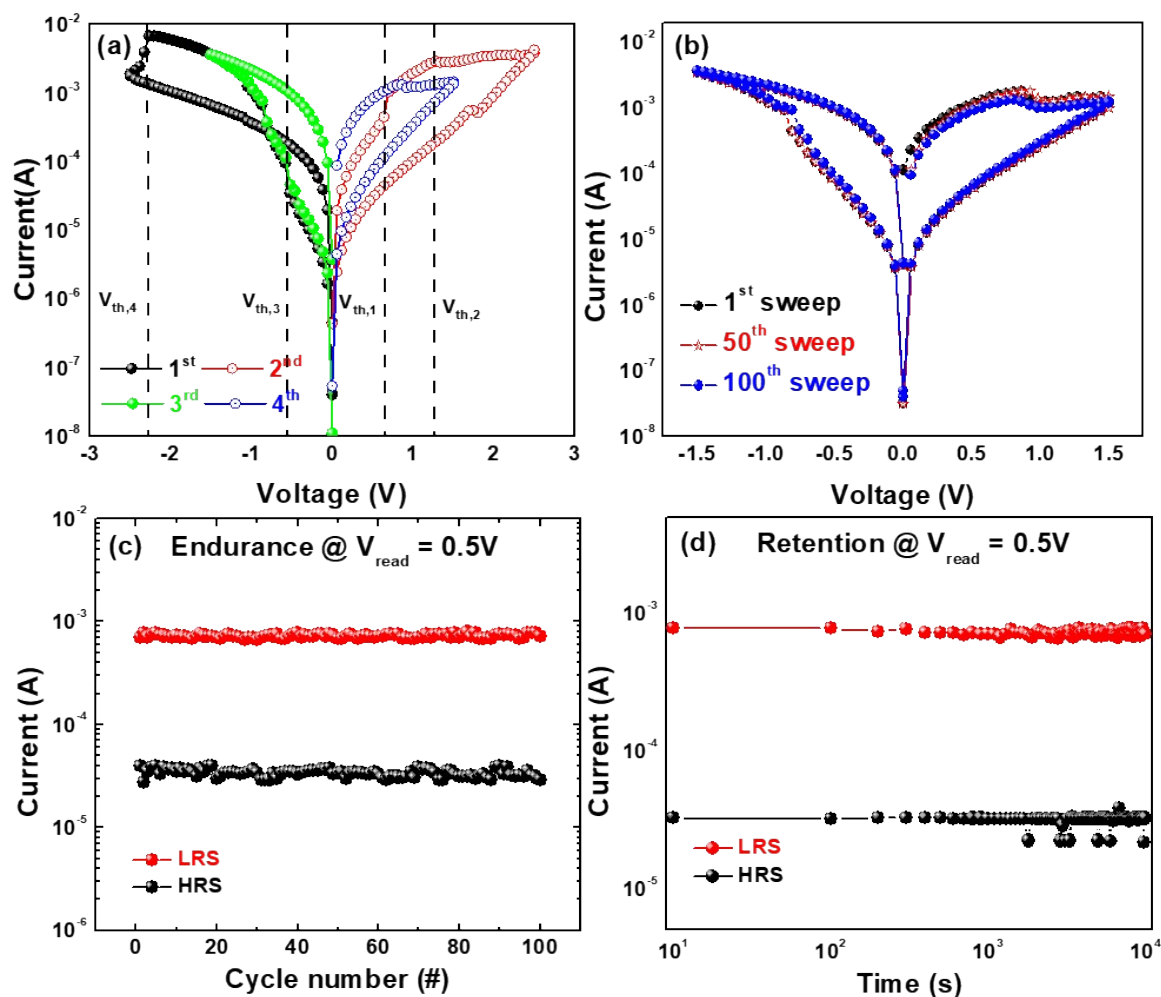

**Figure S4.** The device characteristics with nano-plateau structured r-TiO<sub>2</sub>. (a) The voltages induced CRS to BRS conversion, (b) BRS induced by lower voltage sweeps, (c) the endurance of the device presenting the reproducibility of the switching cycles and (d) the retention of LRS and HRS depicting the stability of states with time.

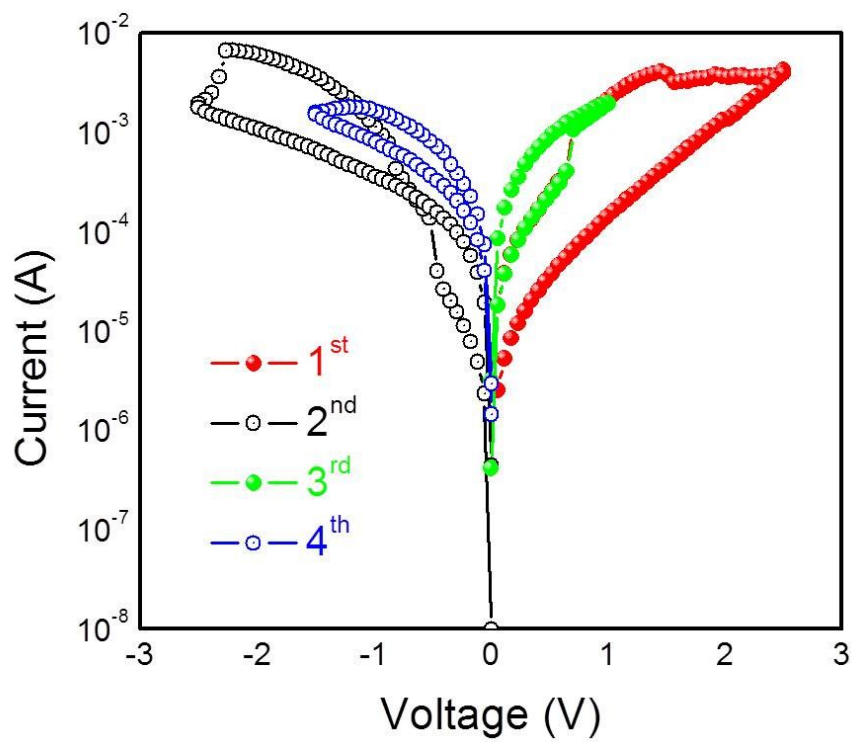

**Figure S5.** BRS with SET at positive sweep and RESET at negative sweep voltage after CRS characteristic.

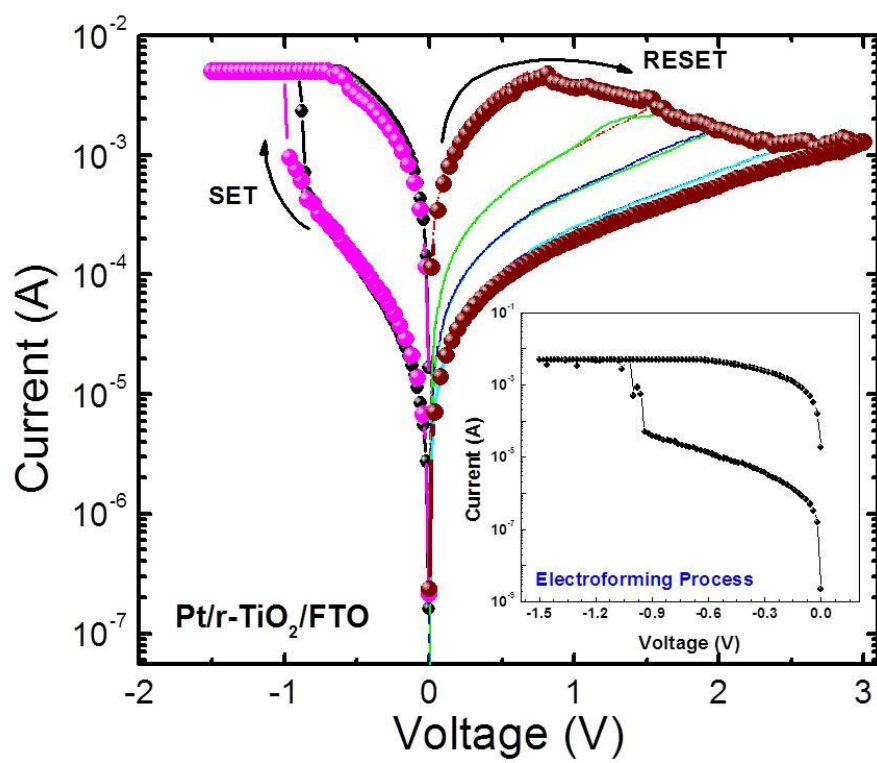

**Figure S6.** The I-V characteristics of Pt/r-TiO<sub>2</sub>/FTO device exhibiting only BRS with SET at negative voltage sweep and RESET at positive voltage sweep after electroforming process.

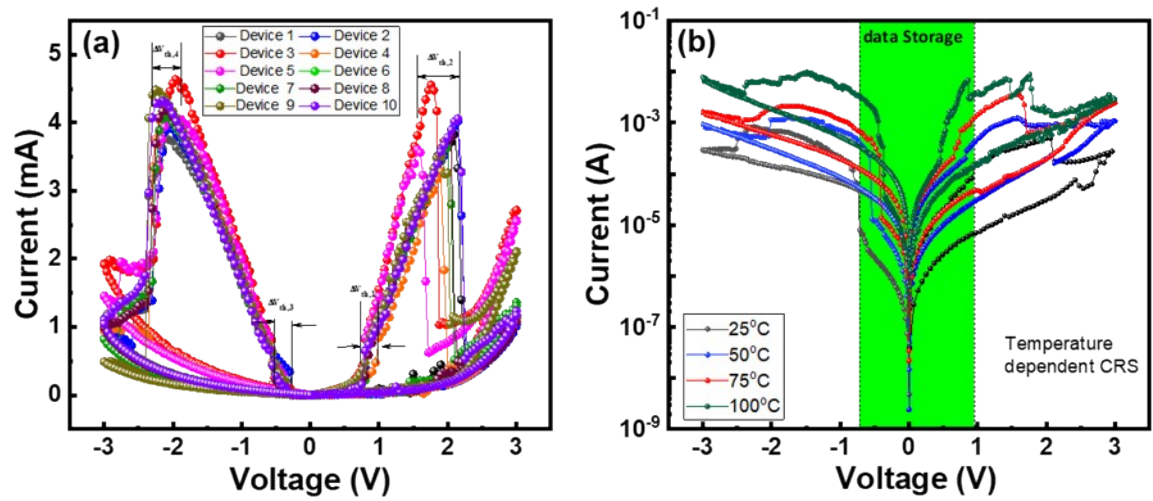

**Figure S7.** The electrical characteristics showing (a) CRS behavior of 10 randomly selected devices and (b) CRS characteristics of the device at elevated temperatures.

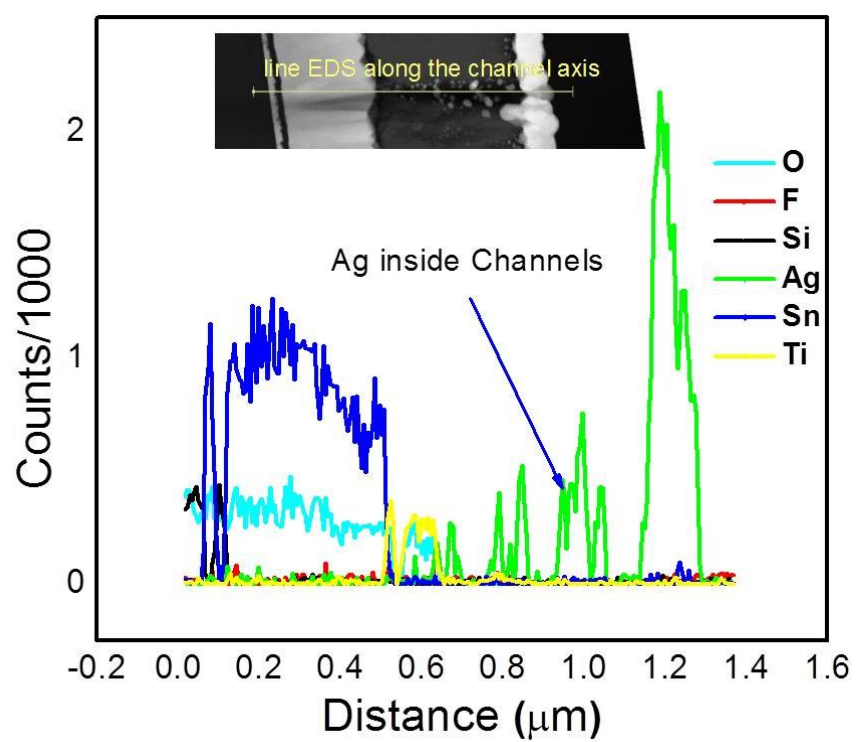

**Figure S8.** The elemental line EDX in STEM mode along the pre-defined channels

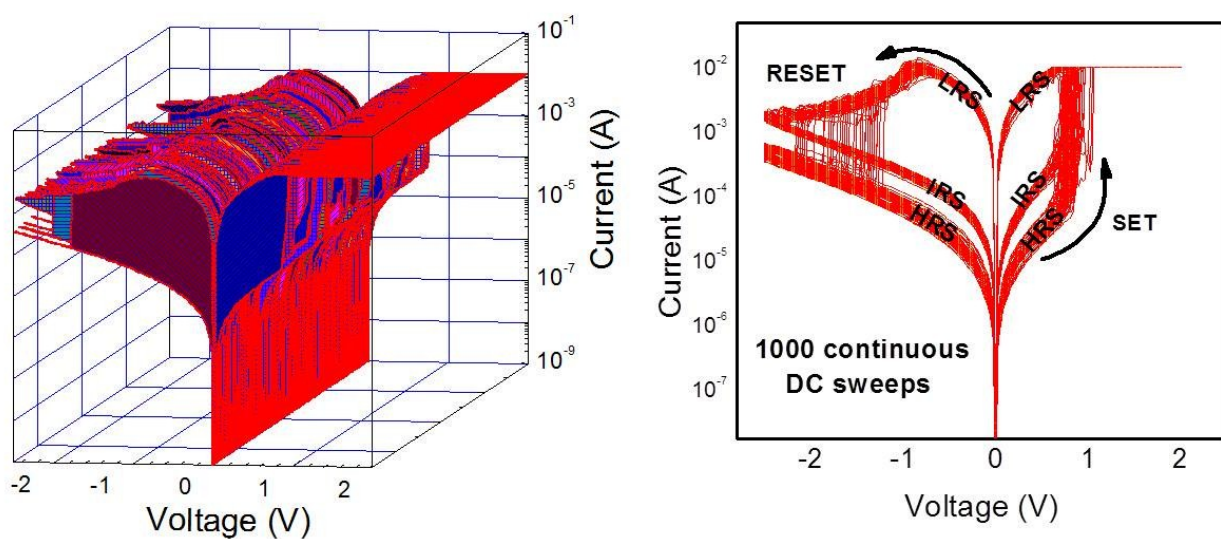

**Figure S9.** The electrical stability of device with nano-channel r-TiO<sub>2</sub> thin film. (a) The representative 3D BRS characteristic and (b) the collective 1000 consecutive sweeps with any degradation in  $I_{ON/OFF}$  window

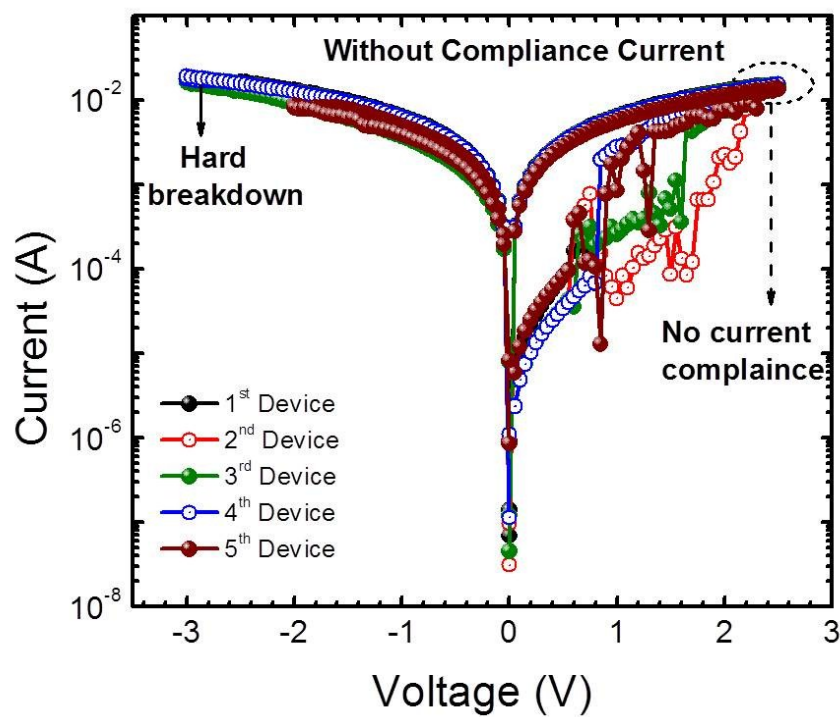

**Figure S10.** I-V characteristics depicting the RESET failure of the device when no compliance is applied during the initial SET process.

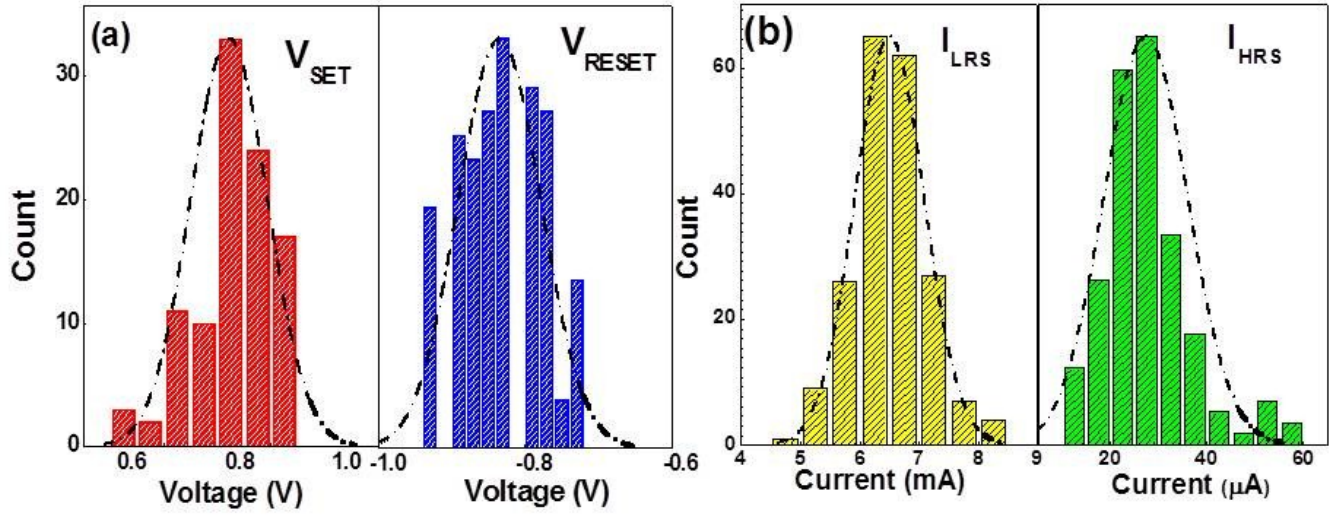

**Figure S11.** The histogram of switching parameters (a)  $V_{SET}$  and  $V_{RESET}$  histogram as well as (b)  $I_{LRS}$  and  $I_{HRS}$  levels showing very small variations.
